# Supplementary material for: Selfish uptake versus extracellular arabinoxylan degradation in the primary degrader Ruminiclostridium cellulolyticum, a new string to its bow
Source: Springer Nature journal article supplement (doi:10.1186/s13068-022-02225-8), 2022-11-19
Supplement: MOESM1 [file 13068_2022_2225_MOESM1_ESM.pdf]

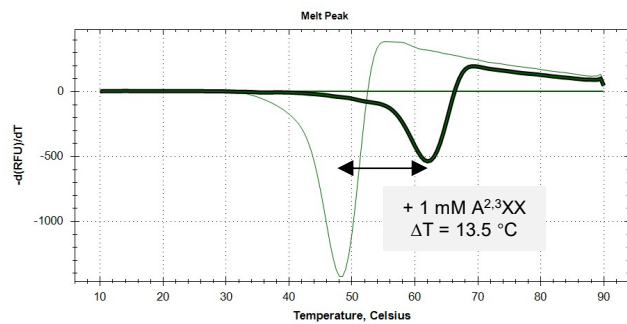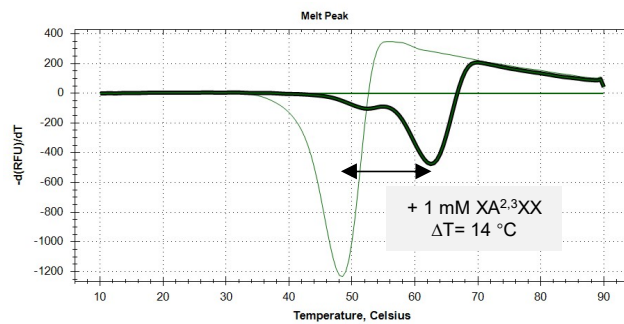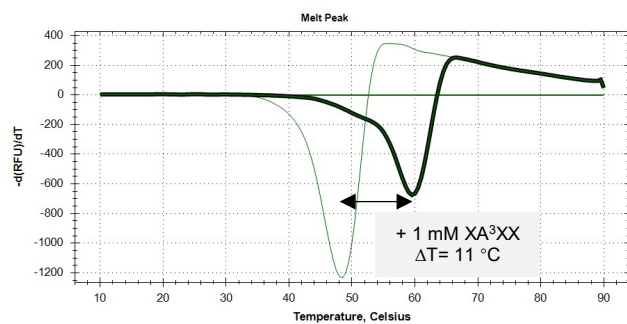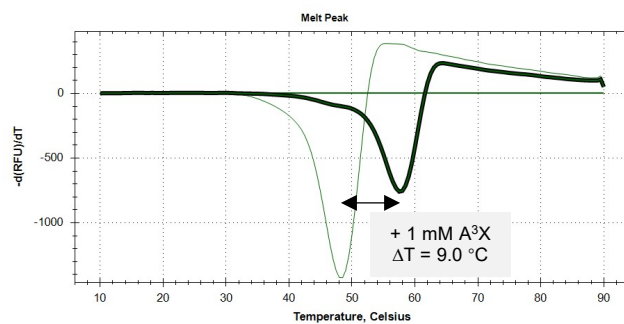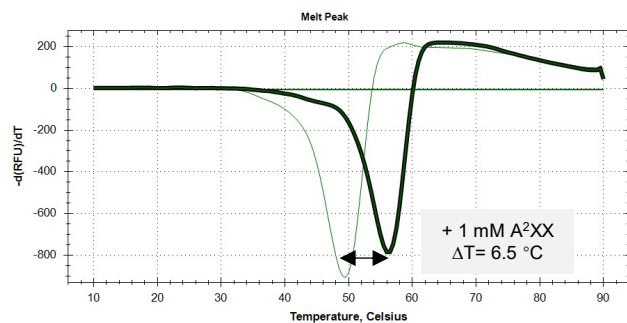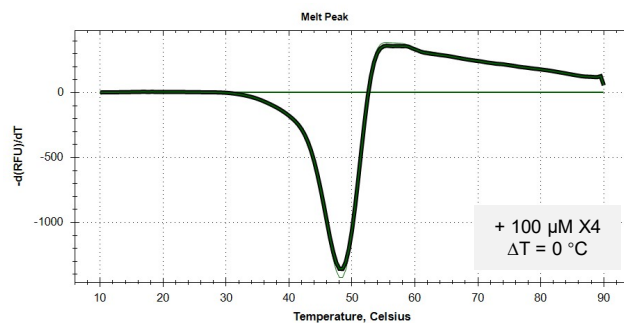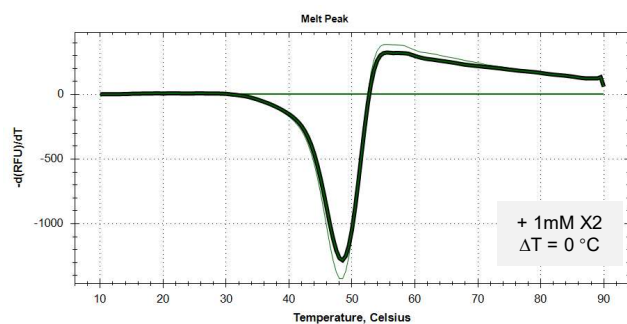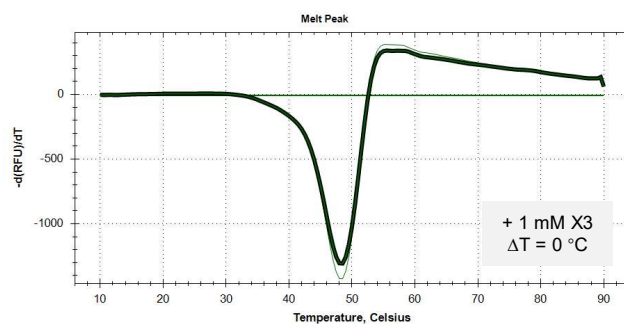

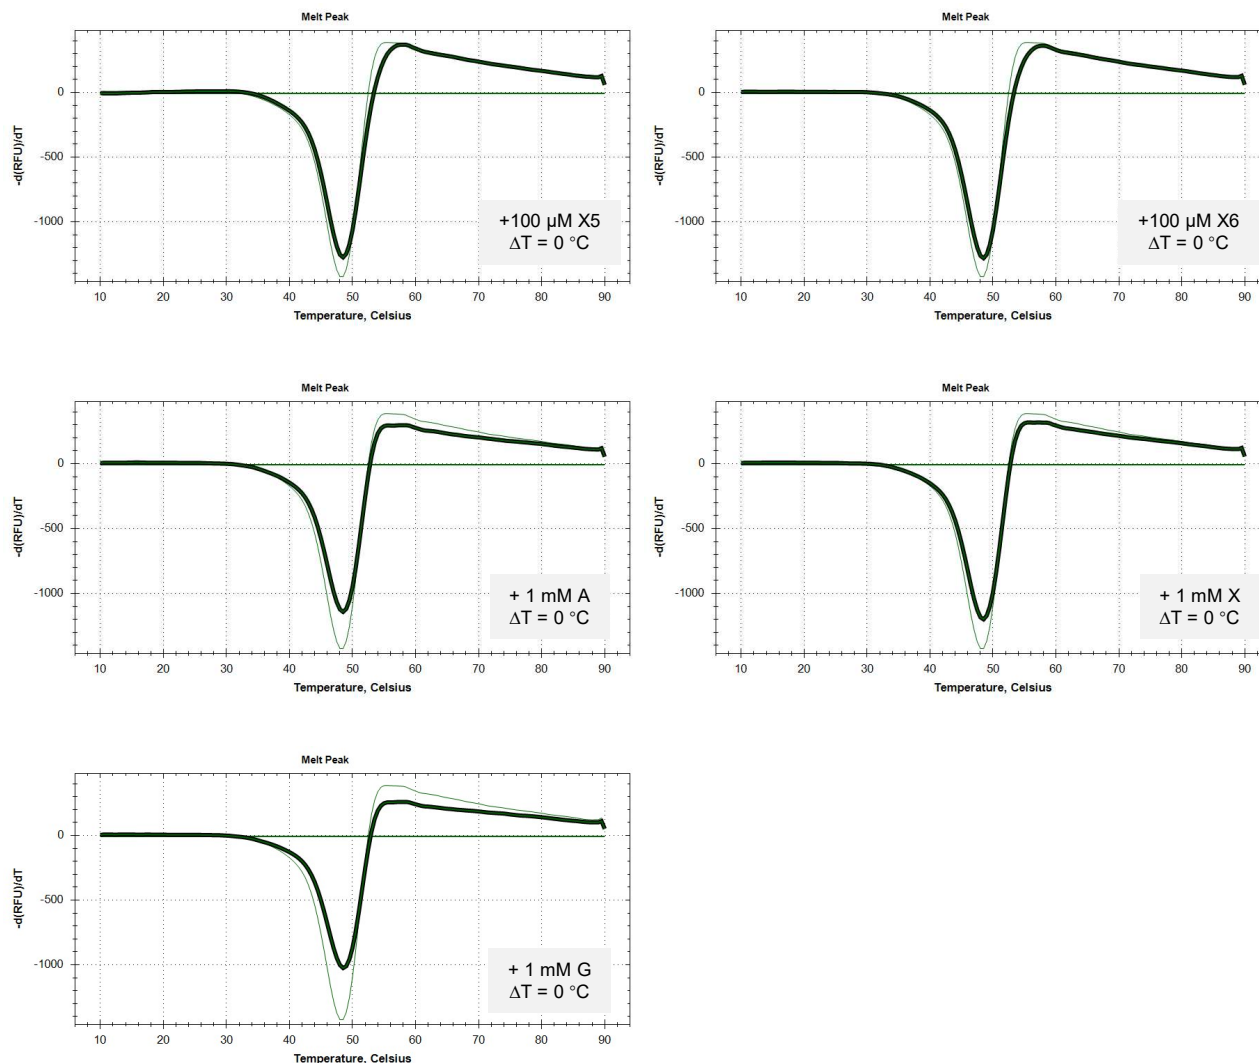

#### Additional file 1. Interaction test between XuaA and various carbohydrate by thermal shift assay.

XuaA was incubated with the sugars in presence of SYPRO orange and the temperature was increased from 10 to 90°C with 0,5°C increments every 30 s. The melting curve obtained corresponds to the first derivative of the fluorescence (Raw Fluorescence Unit) plotted as a function of the temperature. Green, the melting curve of XuaA without ligand, black bold, the melting curve of XuaA with the tested sugars as indicated. All graphs are representative of three experiments. The shift is visualized with the two-heads arrows. X, A and G are xylose, arabinose and glucose, respectively.
